# Supplementary material
Source: publisher figshare collection journal article supplement (https://karger.figshare.com/ndownloader/files/36552690)
Supplement: Supplementary file 1 [file 36552690]

**Recruitment**

**HM group (n=38)**

**LMM group (n=29)**

**Excluded: n=63, declined to continue**

**CASIA2 image after 3D accommodation**

**CASIA2 SS-OCT image acquisition**

**Lens power calculation**

**Slit lamp examination, BCVA, AL**

**HM group (n=74)**

**LMM group (n=56)**

**Spherical Equivalent**

**Inclusion/Exclusion**

**Informed consent**

-5.0D<SE≤-0.5D

SE≤-5.0D
